# Supplementary material for: Rhythmic transcription of Bmal1 stabilizes the circadian timekeeping system in mammals
Source: PubMed Central journal article supplement (PMC9399252; doi:10.1038/s41467-022-32326-9), 2022-08-23
Supplement: 41467_2022_32326_MOESM3_ESM.pdf [file 41467_2022_32326_MOESM3_ESM.pdf]

**Title:** Supplementary Data 1

**Description:** Gene expression levels in the wild type and  $\Delta$ RRRE liver. Sheet1, "Transcriptome data": Processed transcriptome data representing FPKM values for each gene. Sheet2, "Mapped reads": Results of the RNA-seq read alignment.

**Title:** Supplementary Data 2

**Description:** Semi-quantified amounts of peptides in the total proteome analysis. The amount of each peptide in  $\Delta$ RRRE was averaged with all data points, divided by the averaged value of WT, and shown by a fold change ["Ratio ( $\Delta$ RRRE/WT)"]. Upregulated or downregulated proteins were highlighted as ["UP or DOWN (in  $\Delta$ RRRE)"] according to the analysis of ["Ratio ( $\Delta$ RRRE/WT)"] and two-sided Student's t-test ["TTEST ( $\Delta$ RRRE vs WT)"]. Gene Accessions correspond to SwissProt ID.

**Title:** Supplementary Data 3

**Description:** Gene Ontology (GO) enrichment analysis with differentially expressed genes in  $\Delta$ RRRE. Upregulated and downregulated genes were independently subjected to GO analysis. Genes are represented as SwissProt ID.

**Title:** Supplementary Data 4

**Description:** Semi-quantified amount of phosphorylated peptides in the phospho-proteome analysis. The circadian rhythmicity of the amount of phosphorylated peptides in the  $\Delta$ RRRE mutant and WT. Rhythmic genes were identified by the BIO\_CYCLE and described in the "Rhythm detection" column (see also Methods).

**Title:** Supplementary Data 5

**Description:** The time-of-day-dependent changes in kinase activities in the wild type and  $\Delta$ RRRE mutant. Sheet1, "KSEA\_Kinase": A kinase activity score is shown by the log2 fold changes normalized by the total amount of substrate peptides in WT samples. Sheet2, "KSEA\_Substrate": The semi-quantified amount of each substrate peptide.
